# Supplementary material for: The conformation of pyrogallol as a result of cocrystallization with N-heterocyclic bases
Source: Royal Society of Chemistry journal article supplement (doi:10.1039/c2ce25821h), 2012-01-01
Supplement: c2ce25821h.pdf [file c2ce25821h.pdf]

## Electronic Supplementary Information (ESI)

### The conformation of pyrogallol as a result of cocrystallization with N-heterocyclic bases

Mikelis V. Veidis,<sup>\*a</sup> Liana Orola,<sup>a</sup> and Ilpo Mutikainen<sup>b</sup> and Inese Sarcevica<sup>ac</sup>

<sup>a</sup>Faculty of Chemistry, University of Latvia, Kr. Valdemara 48, Riga, LV-1013, Latvia

<sup>b</sup>Laboratory of Inorganic Chemistry, Department of Chemistry, University of Helsinki, FIN-00014, Helsinki, Finland

<sup>c</sup>Latvia Institute of Organic Synthesis, Aizkraukles 21, Riga, LV-1006, Latvia

#### Contents

**Figure S1** PXRD patterns of **1** obtained by crystallization from ethanol, by liquid-assisted grinding, and calculated pattern from the crystal structure.

**Figure S2** PXRD patterns of **2** obtained by crystallization from ethanol, by liquid-assisted grinding, and calculated pattern from the crystal structure.

**Figure S3** PXRD pattern of **3a** obtained by crystallization from ethanol, by liquid-assisted grinding, and calculated pattern from the crystal structure.

**Figure S4** PXRD patterns of **3b** obtained by liquid-assisted grinding, by seeding crystallization from ethanol, and calculated pattern from the crystal structure.

**Figure S5** The molecular structure of **1** with displacement ellipsoids drawn at 50% probability level.

**Figure S6** The molecular structure of **2** with displacement ellipsoids drawn at 50% probability level.

**Figure S7** The molecular structure of **3a** with displacement ellipsoids drawn at 50% probability level.

**Figure S8** The molecular structure of **3b** with displacement ellipsoids drawn at 50% probability level.

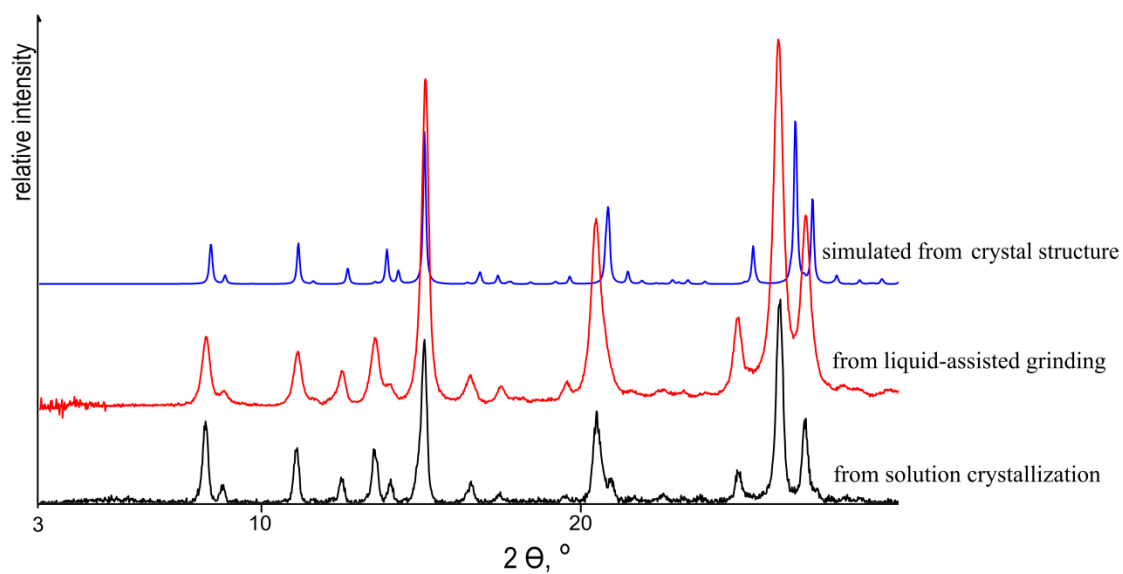

**Figure S1.** PXRD patterns of **1** obtained by crystallization from ethanol, by liquid-assisted grinding, and calculated pattern from the crystal structure.

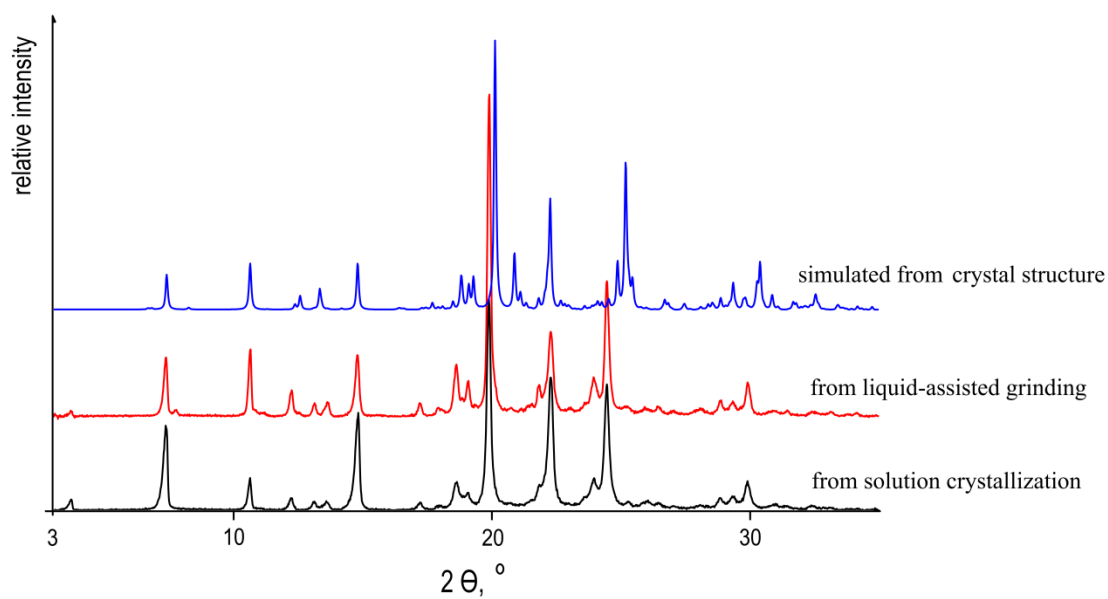

**Figure S2.** PXRD patterns of **2** obtained by crystallization from ethanol, by liquid-assisted grinding, and calculated pattern from the crystal structure.

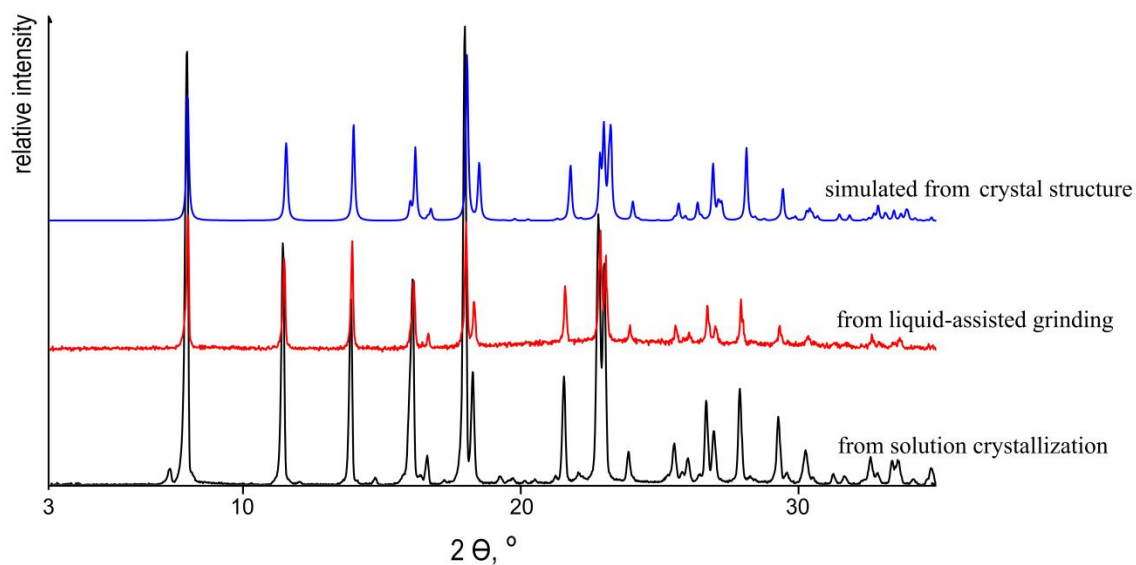

**Figure S3.** PXRD pattern of **3a** obtained by crystallization from ethanol, by liquid-assisted grinding, and calculated pattern from the crystal structure.

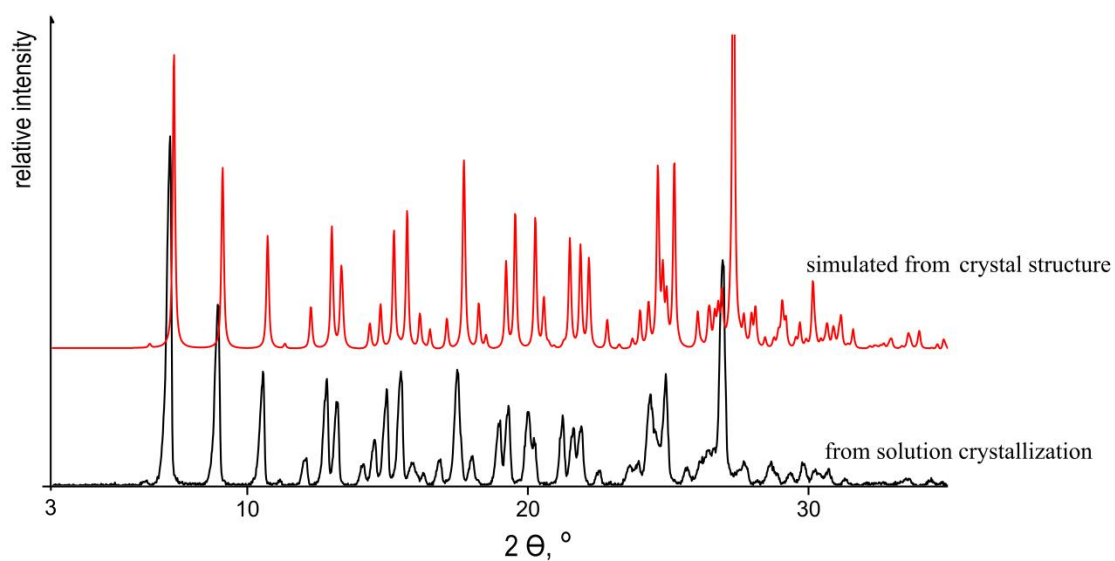

**Figure S4.** PXRD patterns of **3b** obtained by liquid-assisted grinding, by seeding crystallization from ethanol, and calculated pattern from the crystal structure.

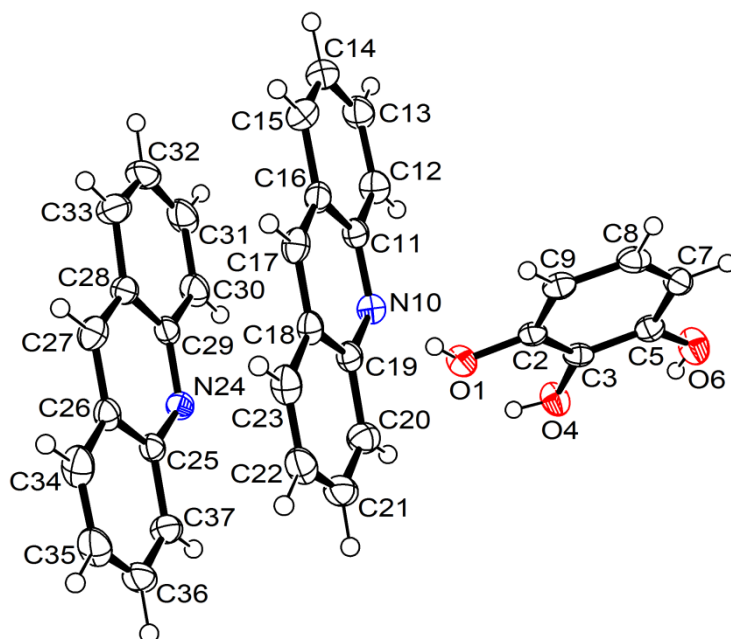

**Figure S5.** The molecular structure of **1** with displacement ellipsoids drawn at 50% probability level.

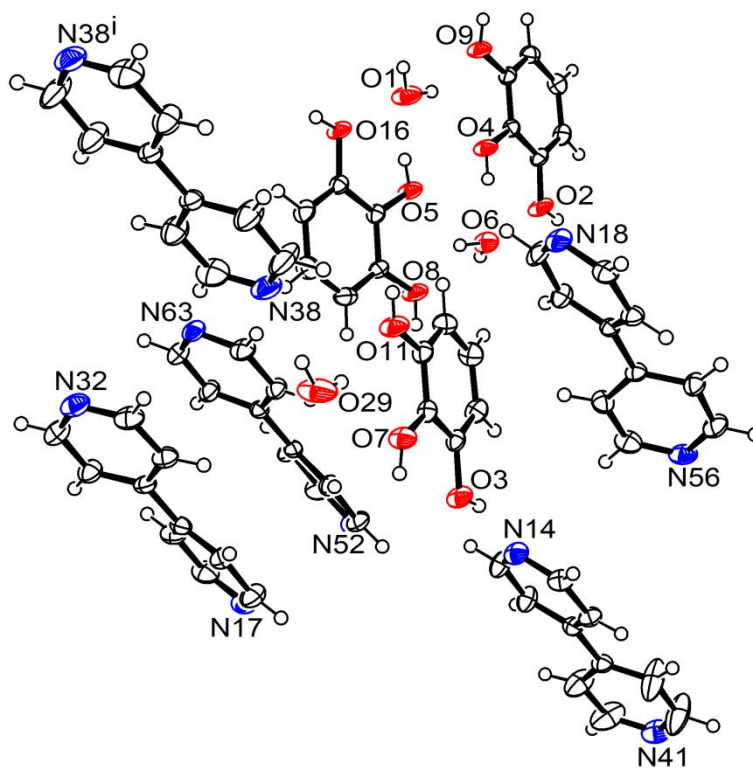

**Figure S6.** The molecular structure of **2** with displacement ellipsoids drawn at 50% probability level.

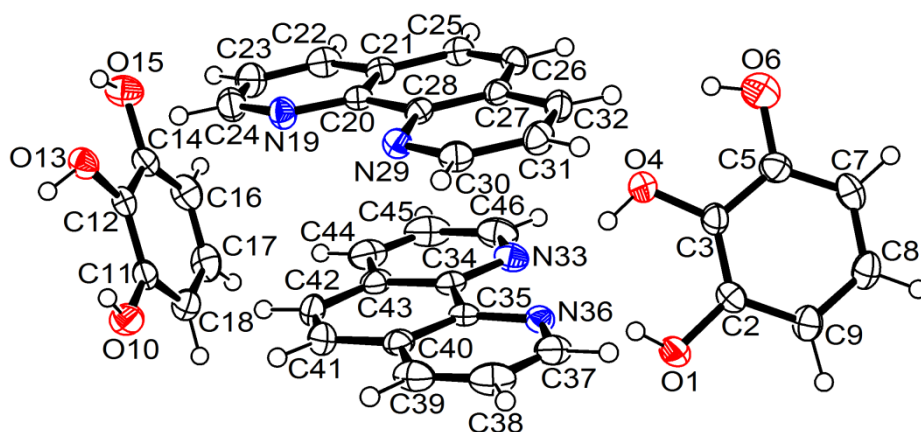

**Figure S7.** The molecular structure of **3a** with displacement ellipsoids drawn at 50% probability level.

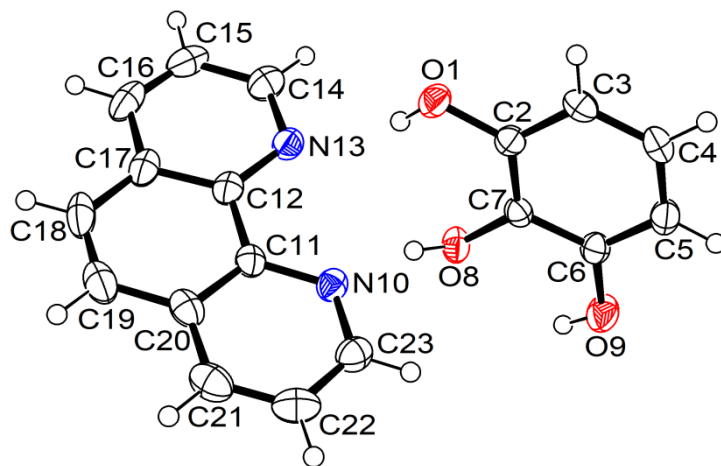

**Figure S8.** The molecular structure of **3b** with displacement ellipsoids drawn at 50% probability.
